# Supplementary material
Source: publisher figshare collection journal article supplement (https://acs.figshare.com/ndownloader/files/13791251)
Supplement: Supplementary file 1 [file 13791251]

## Supporting Information

### **Deposition Kinetics of Colloidal Manganese Dioxide onto Representative Surfaces in Aquatic Environments: The Role of Humic Acid and Biomacromolecules**

Xiaoliu Huangfu<sup>†\*</sup>, Chengxue Ma<sup>†</sup>, Ruixing Huang<sup>†</sup>, Qiang He<sup>†\*</sup>, Caihong Liu<sup>†</sup>, Jian Zhou<sup>†</sup>, Jin Jiang<sup>‡</sup>, Jun Ma<sup>‡</sup>, Yinying Zhu<sup>†</sup>, Muhua Huang<sup>†</sup>

*<sup>†</sup> Key Laboratory of Eco-environments in the Three Gorges Reservoir Region, Ministry of Education, Faculty of Urban Construction and Environmental Engineering, National Centre for International Research of Low-Carbon and Green Buildings, Chongqing University, Chongqing 400044, China*

*<sup>‡</sup> State Key Laboratory of Urban Water Resource and Environment, School of Municipal and Environmental Engineering, Harbin Institute of Technology, Harbin 150090, China*

Corresponding Authors: Dr. Xiaoliu Huangfu and Professor Qiang He

Phone: 86-23-65120980; fax: 86-23-65120980; e-mail: hfxl@cqu.edu.cn (X. H.);

hq0980@126.com (Q. H.)

### **Summary**

Eighteen pages, including 15 figures, 5 tables, and 4 texts.

**Text S1. Cleaning Methods for QCM-D Crystal Sensors:**

1. QSX 303 Silicon Dioxide , and QSX 309 Aluminum Oxide

- a. UV/ozone treatment for 20 minutes.
- b. Immerse the sensor surface in the solution of 2% SDS for 30 min in room temperature.
- c. Rinse with DDI water and dry with nitrogen gas.
- d. UV/ozone treatment for 20 minutes.

Note that for crystal sensors used in coated surfaces deposition experiments, the crystal sensors were immersed in 1% Hellmanex II instead of 2% SDS solution.

2. QSX 326 Iron Oxide

- a. Sonicate the sensor surface in methanol for 15 minutes.
- b. Rinse with DDI water.
- c. Dry with nitrogen gas.

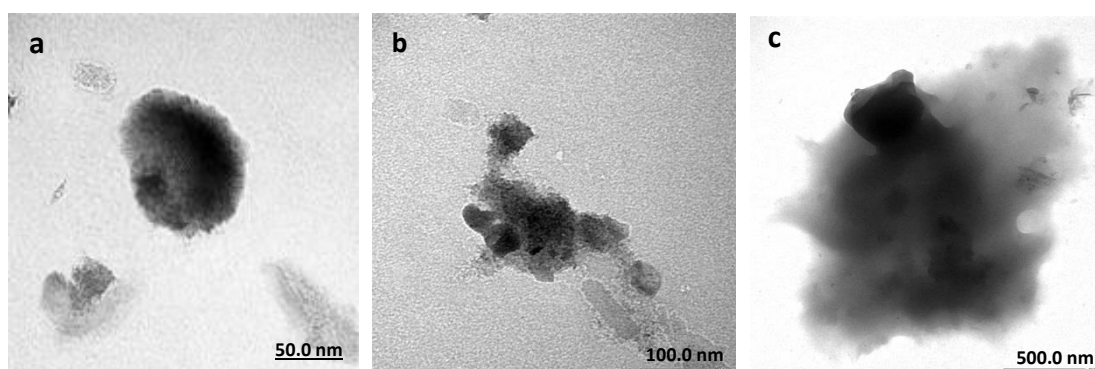

**Figure S1** Representative TEM micrograph of MnO<sub>2</sub> aggregates

## **Text S2 Deposition kinetics of colloidal MnO<sub>2</sub> on PLL coating environmental surfaces**

To achieve fast deposition of MnO<sub>2</sub> colloids on tested surfaces, PLL was selected to coat on all three tested surfaces. PLL was dissolved in the desired electrolyte solutions at the concentration of 0.1 g/L. The crystal was coated by PLL by flowing 2 mL of the electrolyte solution containing PLL across the substrate surface. The solution was injected into the system for at least 20 min at 0.15 mL/min. During PLL deposition,  $\Delta f_{(3)}$  first decreased and then plateaued, indicating that the surface was completely covered with PLL. Then, the PLL-coated surface was equilibrated with 2 mL of the background electrolyte before the deposition of MnO<sub>2</sub> colloidal suspensions onto the PLL-coated surface.

The representative deposition profiles could be found in Figure S2, S3, and S4, and the corresponding  $r_f$  were presented in Figure S5. Generally, in Figure S2, S3, and S4, similar frequency shifts were observed when MnO<sub>2</sub> colloids deposition on selected surfaces at NaNO<sub>3</sub> concentration of 1 mM, 7 mM, 15 mM, and 17 mM, respectively. Our previous work had indicated that aggregation of colloidal MnO<sub>2</sub> was ignorable when NaNO<sub>3</sub> concentration lower than 10 mM, whereas obvious aggregation could be observed when NaNO<sub>3</sub> concentration was higher than 15 mM.<sup>1</sup> Deposition results here were in agreement with this observation. For all favorable deposition, the frequency shifts obtained from QCM-D were similar at 1 mM and 7 mM NaNO<sub>3</sub>, which decreased lightly in the presence of 15 mM NaNO<sub>3</sub> and decreased notably when NaNO<sub>3</sub> concentration was higher than 15 mM, i.e., 17 mM. Data in Figure S5 revealed that  $r_f$  values decreased dramatically after a plateau when NaNO<sub>3</sub> concentration was higher than 10 mM for all three PLL coating surfaces. The increase in salt concentration leading to a decrease in the magnitude of attractive electrostatic interactions between oppositely charged colloids and PLL surface might be mainly responsible for this decrease in the deposition under corresponding condition. MnO<sub>2</sub> colloidal aggregation resulting in lower diffusivities at further high Na<sup>+</sup> concentrations discussed before can also lead to this hindered deposition.

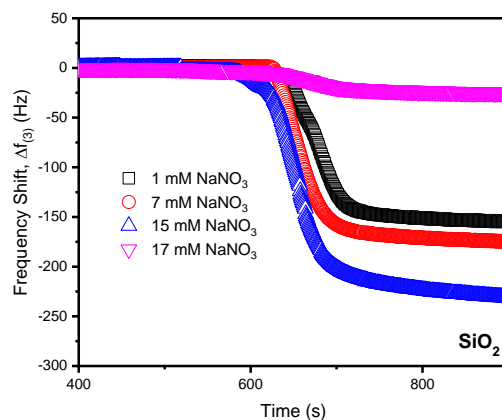

**Figure S2.** Representative frequency shift ( $\Delta f_{(3)}$ ) obtained by QCM-D as a function of  $\text{NaNO}_3$  concentration at pH 6.0 when colloidal  $\text{MnO}_2$  was deposited on PLL coated  $\text{SiO}_2$  surface.

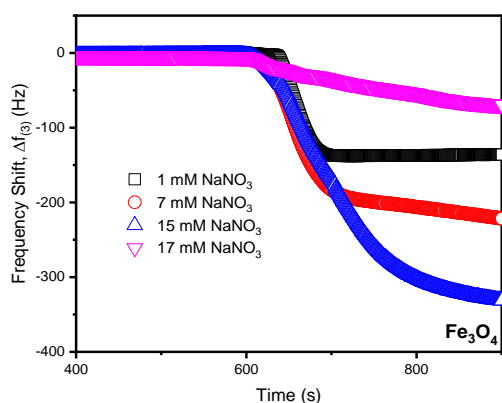

**Figure S3.** Representative frequency shift ( $\Delta f_{(3)}$ ) obtained by QCM-D as a function of  $\text{NaNO}_3$  concentration at pH 6.0 when colloidal  $\text{MnO}_2$  was deposited on PLL coated  $\text{Fe}_3\text{O}_4$  surface.

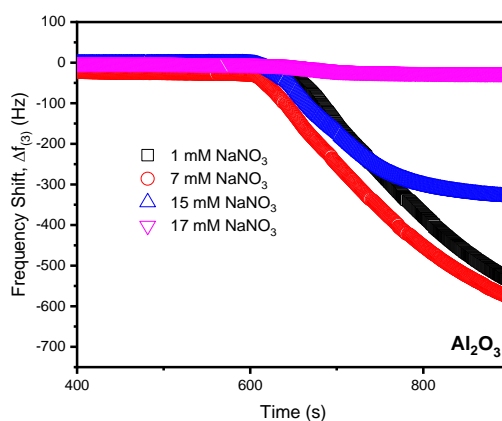

**Figure S4.** Representative frequency shift ( $\Delta f_{(3)}$ ) obtained by QCM-D as a function of  $\text{NaNO}_3$  concentration at pH 6.0 when colloidal  $\text{MnO}_2$  was deposited on PLL coated  $\text{Al}_2\text{O}_3$  surface.

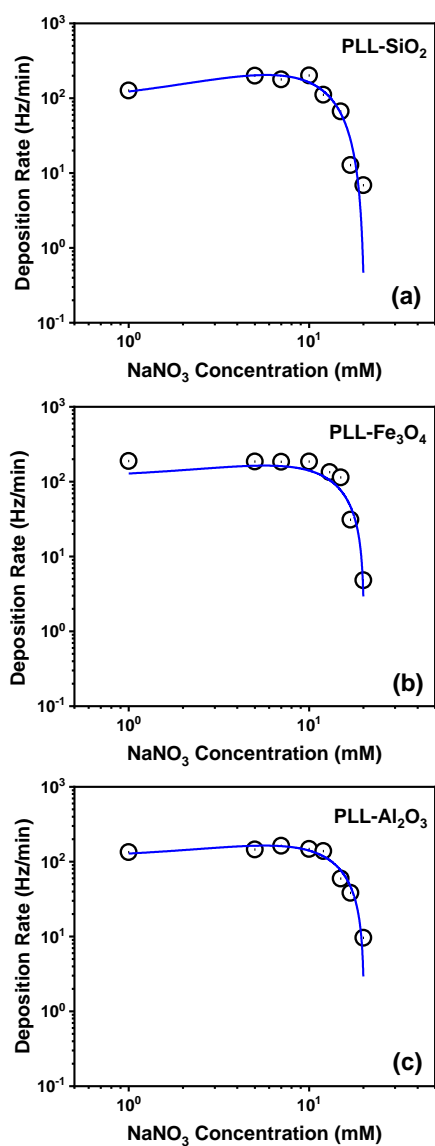

**Figure S5.** Favorable deposition rates of colloidal  $\text{MnO}_2$  onto PLL-coated surfaces (i.e.,  $\text{SiO}_2$  surface,  $\text{Fe}_3\text{O}_4$  surface, and  $\text{Al}_2\text{O}_3$  surface) as function of  $\text{NaNO}_3$  concentration at pH 6.0.

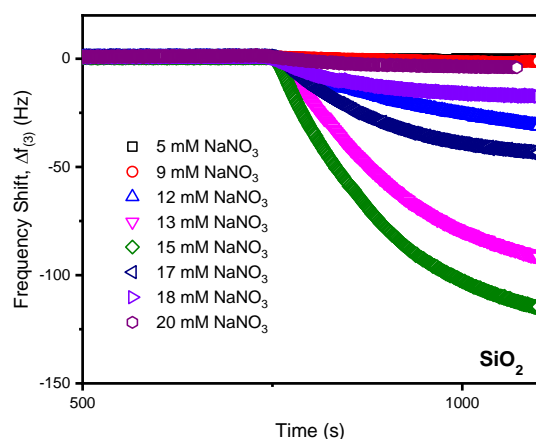

**Figure S6.** Representative frequency shift ( $\Delta f_{(3)}$ ) obtained by QCM-D as a function of  $\text{NaNO}_3$  concentration at pH 6.0 when colloidal  $\text{MnO}_2$  was deposited on bare  $\text{SiO}_2$  surface.

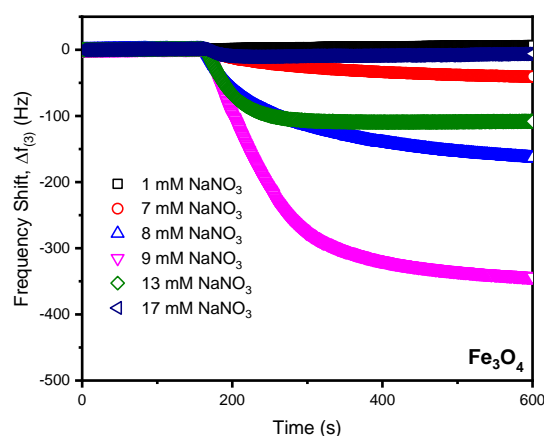

**Figure S7.** Representative frequency shift ( $\Delta f_{(3)}$ ) obtained by QCM-D as a function of  $\text{NaNO}_3$  concentration at pH 6.0 when colloidal  $\text{MnO}_2$  was deposited on bare  $\text{Fe}_3\text{O}_4$  surface.

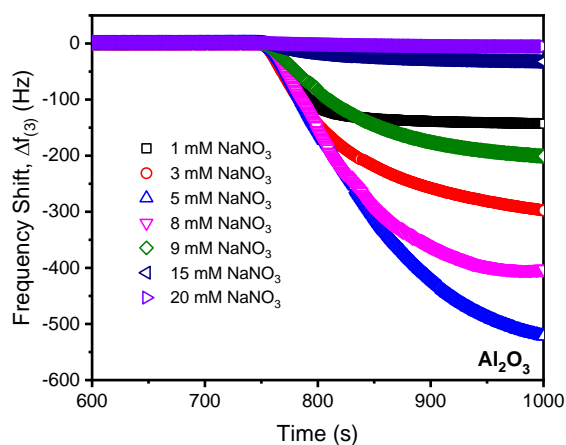

**Figure S8.** Representative frequency shift ( $\Delta f_{(3)}$ ) obtained by QCM-D as a function of  $\text{NaNO}_3$  concentration at pH 6.0 when colloidal  $\text{MnO}_2$  was deposited on bare  $\text{Al}_2\text{O}_3$  surface.

### Text S3 Aggregation experiments of colloidal MnO<sub>2</sub>

For aggregation experiments of MnO<sub>2</sub> colloids in the absence and presence of macromolecules, time-resolved dynamic light scattering (TR-DLS) (Nano ZS90, Malvern, UK) operating with a He-Ne laser at a wavelength of 633 nm and a detection angle of 90° was used to investigate the early stage increase of colloidal averaged hydrodynamic diameter (Dh) at various NaNO<sub>3</sub> concentrations. The MnO<sub>2</sub> solution was diluted to 1mM and the concentration of HA, alginate and BSA was controlled at 5 mg/L of TOC. Detailed protocols of aggregation measurement and determination of aggregation kinetics can be found in our previous publication.<sup>1</sup>

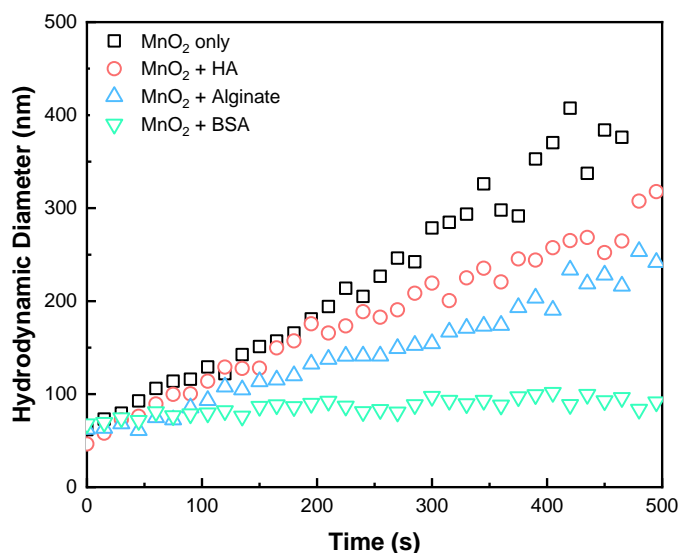

**Figure S9.** Representative aggregation profiles of MnO<sub>2</sub> colloids in 15 mM NaNO<sub>3</sub>. Aggregation experiments were conducted at pH 6.0 and 25 °C.

**Table S1 .** The initial aggregation rate of MnO<sub>2</sub> colloids in the presence of HA, Alginate and BSA as a function of NaNO<sub>3</sub>.

| Na concentration<br>(mM) | Aggregation Rate (nms <sup>-1</sup> ) |                      |                            |                       |
|--------------------------|---------------------------------------|----------------------|----------------------------|-----------------------|
|                          | MnO <sub>2</sub> only                 | MnO <sub>2</sub> +HA | MnO <sub>2</sub> +Alginate | MnO <sub>2</sub> +BSA |
| 5                        | 0.02±0.01                             | -                    | -                          | -                     |
| 10                       | 0.05±0.01                             | 0.05±0.01            | 0.04±0.01                  | -                     |
| 15                       | 0.73±0.05                             | 0.49±0.11            | 0.34±0.07                  | 0.06±0.02             |
| 17                       | 1.30±0.12                             | 1.09±0.16            | 1.19±0.10                  | 0.24±0.11             |
| 20                       | 3.01±0.31                             | 2.71±0.24            | 2.38±0.25                  | 0.41±0.16             |
| 30                       | 5.74±0.49                             | 3.42±0.41            | 3.38±0.32                  | 2.10±0.26             |
| 50                       | 5.28±0.63                             | 3.81±0.46            | 3.96±0.41                  | 1.85±0.19             |

**Table S2.** Zeta potential (mV) of MnO<sub>2</sub> colloids and SiO<sub>2</sub>, Al<sub>2</sub>O<sub>3</sub>, and Fe<sub>3</sub>O<sub>4</sub> over a range of ionic strength.

|                                    | NaNO <sub>3</sub> concentraion (mM) |       |       |       |       | References                       |
|------------------------------------|-------------------------------------|-------|-------|-------|-------|----------------------------------|
|                                    | 1                                   | 5     | 10    | 15    | 20    |                                  |
| <b>MnO<sub>2</sub> colloids</b>    | -58.72                              | -48.4 | -35.5 | -33.2 | -30.9 | Huangfu, X. L. etc <sup>1</sup>  |
| <b>SiO<sub>2</sub></b>             | -80                                 | -66.8 | -50.4 | -49.1 | -47.2 | Thomas W. Healy <sup>2</sup>     |
| <b>Al<sub>2</sub>O<sub>3</sub></b> | 40.6                                | 45.4  | 51.4  | 52.06 | 52.73 | Reyes Bahena, J. L. <sup>3</sup> |
| <b>Fe<sub>3</sub>O<sub>4</sub></b> | -17.7                               | -15   | -11.7 | -8.4  | -5    | Murat Erdemoğlu <sup>4</sup>     |

#### Text S4. Calculation of DLVO and EDLVO Interaction Energy for MnO<sub>2</sub> colloids approaching Surfaces in the Absence of Macromolecules

##### 1. DLVO Theory

To further interpret deposition kinetics of colloidal MnO<sub>2</sub> on selected environmental surfaces, classical DLVO was employed for calculating the interaction energy when they approached to these three surfaces. The main interactions acting on a NP include van der Waals energy ( $V_{VDW}$ ), the electrstatic energy (i.e., electric double layer energy,  $V_{EDL}$ ). The total interaction energy ( $V_T$ ) and modified interaction energy ( $V_{T.modified}$ ) could be calculated using the following equations:<sup>5</sup>

$$V_T = V_{VDW} + V_{EDL} \quad (S1)$$

where  $V_{VDW}$  is the van der Waals attractive energy between a particle and a surface:

$$V_{VDW}(h) = -\frac{A_{123}a_p}{6h(1+14h/\lambda)} \quad (S2)$$

where  $A_{123}$  is Hamaker constant for the deposition of a nanoparticle of composition “1” onto a surface of composition “3” when suspended in a medium “2”;  $a_p$  is particle radius.  $h$  surface-to-surface separation distance;  $\lambda$  is characteristic wavelength, 100 nm.  $V_{EDL}$  could be calculated by:

$$V_{EDL}(h) = 64\pi\epsilon_0\epsilon_r a_p (k_B T / ze)^2 \Gamma_1 \Gamma_2 \exp(-\kappa h) \quad (S3)$$



where  $\varepsilon_0$  is dielectric permittivity in vacuum,  $8.85 \times 10^{-12}$  F/m;  $\varepsilon_r$  is relative dielectric permittivity of solution 78.5;  $k_B$  Boltzmann constant,  $1.3805 \times 10^{-23}$  J/K; T is absolute temperature, T=298.15 K;  $z$  counterion valence,  $z=1$ ;  $e$  is electron charge,  $1.602 \times 10^{-19}$  C;  $\Gamma_1, \Gamma_2$  is dimensionless surface potential for particle or collector presented in Table S2;  $\kappa$  is inverse Debye length.

$$\Gamma_i = \tanh\left(\frac{ze\psi_i}{4k_B T}\right) \quad (S4)$$

where  $\psi_i$  is surface potential.

$$\kappa = \left(\frac{2e^2 N_A I}{\varepsilon_0 \varepsilon_r k_B T}\right)^{1/2} \quad (S5)$$

where  $N_A$  Avogadro constant,  $6.022 \times 10^{23}$ ;  $I$  is ionic strength.

## 2. Extended DLVO Interaction-Energy Calculations

In order to better understand the distinct impacts of humic acid and biomacromolecules on the deposition behavior of the nMnO<sub>2</sub> on environmental surfaces at various conditions, the DLVO interaction energy calculations were modified by the incorporation of a steric repulsive energy based on the Flory-Krigbaum theory when MnO<sub>2</sub> colloids approached to selected surfaces in the presence of three organic matters. The total steric interaction energy between a polymer coated colloid and an uncoated collector surface includes two components: a repulsive osmotic energy term,  $V_{osm}$  and an elastic repulsive energy,  $V_{elas}$ .  $V_{osm}$  is due to the exclusion of water molecules surrounding the polymers on the close colloid-surface approach (or compression of a macromolecular layer on a particle contacting a nonadsorbing surface).  $V_{elas}$  arises as the adsorbed macromolecule layers below the thickness of the unperturbed layer ( $l$ ) polymer chains are compressed and leads to the elastic repulsion. The expressions for

$V_{osm}$  and  $V_{elas}$  was given by Vincent<sup>6</sup> the interaction energy between two identical particles with coating of uniform segment density, as:<sup>7</sup>

$$\frac{V_{osm}}{k_B T} = \frac{4\pi a_p}{v_1} \phi_p^2 \left( \frac{1}{2} - \chi \right) l^2 \left( \frac{h}{2l} - \frac{1}{4} - \ln \left( \frac{h}{l} \right) \right) \quad h < l \quad (S6)$$

$$\frac{V_{elas}}{k_B T} = \frac{2\pi a_p}{M_W} \phi_p l^2 \rho_p \left[ \frac{h}{l} \ln \left( \frac{h}{d} \left( \frac{3-h}{2} \right)^2 \right) - 6 \ln \left( \frac{3-h}{2} \right) + 3 \left( 1 - \frac{h}{l} \right)^2 \right] \quad h < l \quad (S7)$$

Where  $v_1$  is the volume of a solvent molecule (0.03 nm<sup>3</sup>).<sup>8</sup>  $\chi$  is the Flory-Huggins solvency parameter, which was assumed to be 0.45, 0.465 and 0.49 for HA, alginate and BSA respectively;<sup>9,10</sup>  $l$  is the thickness of NOM covered on the nMnO<sub>2</sub> surface and was estimated to be 30.2 nm, 24.3 nm and 38.9 nm for HA, alginate and BSA respectively by fitting the Ohshima's soft particle model, which can be found in our previous publication;<sup>11</sup>  $h$  is colloids-to-surface separation distance;  $M_W$  is the molecular weight of the macromolecules<sup>12</sup>, and  $\rho_p$  is the polymer density.  $\phi_p$  is the calculated volume fraction of polymer within the brush layer.

$$\phi_p = 3 \frac{\Gamma_{max} a_p^2}{\rho_p [(l + a_p)^3 - a_p^3]} \quad (S8)$$

$\Gamma_{max}$  is the maximum surface concentration (Kg/m<sup>2</sup>). The theoretical specific surface area of nMnO<sub>2</sub> 144 m<sup>2</sup>/g was used here. Based on the nMnO<sub>2</sub> surface area and the adsorption data of to the nMnO<sub>2</sub> presented in previous study.<sup>11</sup> After calculation, the  $\Gamma_{max}$  for HA, alginate and BSA was 6.84×10<sup>-7</sup> Kg/m<sup>2</sup>, 6.68×10<sup>-7</sup> Kg/m<sup>2</sup> and 1.67×10<sup>-6</sup> Kg/m<sup>2</sup>, respectively. The volume density for HA, alginate and BSA was estimated to be 8.74×10<sup>-3</sup>, 8.48×10<sup>-3</sup> and 1.06×10<sup>-2</sup>, respectively.

The total modified interaction energy ( $V_{T-Extended}$ ) could be calculated using the following equations:

$$V_{T-Extended} = V_{VDW} + V_{EDL} + V_{osm} + V_{elas} \quad (S9)$$

### 3. Calculation of Hamaker Constants

Hamaker constants for colloidal MnO<sub>2</sub> is calculated by<sup>13</sup>:

$$A_{123} = (\sqrt{A_{33}} - \sqrt{A_{22}})(\sqrt{A_{11}} - \sqrt{A_{22}}) \quad (S10)$$

Where  $A_{11}$ ,  $A_{22}$ , and  $A_{33}$  is the Hamaker constants of “1”, “2”, and “3” in vacuum, respectively required for use in these equations. Additionally,  $A_{121}$  is the Hamaker constant for the aggregation of two nanoparticles of composition “1” when suspended in a medium “2”.  $A_{121}$  can be calculated by<sup>13</sup>:

$$A_{121} = (\sqrt{A_{22}} - \sqrt{A_{11}})^2 \quad (S11)$$

**Table S3.** Hamaker constant used for DLVO energy calculation

| NO. | Hamaker constant | System                                                               | Value ( $\times 10^{-20}$ , J) | References                         |
|-----|------------------|----------------------------------------------------------------------|--------------------------------|------------------------------------|
| 1   | $A_{121}$        | nMnO <sub>2</sub> -water-nMnO <sub>2</sub>                           | 7.84                           | Huangfu, X. L. etc <sup>11</sup>   |
| 2   | $A_{22}$         | water                                                                | 3.70                           | Israelachvili, J. N. <sup>14</sup> |
|     | $A_{33}$         | quartz                                                               | 8.86                           | Bergström, L. <sup>15</sup>        |
| 4   | $A_{33}$         | Al <sub>2</sub> O <sub>3</sub>                                       | 14.50 (IKK), 15.20 (SNP)       | Bergström, L. <sup>15</sup>        |
| 5   | $A_{121}$        | Fe <sub>3</sub> O <sub>4</sub> -water-Fe <sub>3</sub> O <sub>4</sub> | 3.3                            | Faure B. etc <sup>16</sup>         |
| 6   | $A_{33}$         | Fe <sub>3</sub> O <sub>4</sub>                                       | 4.3                            | Faure B. etc <sup>16</sup>         |
| 7   | $A_{123}$        | nMnO <sub>2</sub> -water-SiO <sub>2</sub>                            | 2.94                           | This study                         |
| 8   | $A_{123}$        | nMnO <sub>2</sub> -water- Al <sub>2</sub> O <sub>3</sub>             | 5.27                           | This study                         |
| 9   | $A_{123}$        | nMnO <sub>2</sub> -water- Fe <sub>3</sub> O <sub>4</sub>             | 5.09                           | This study                         |

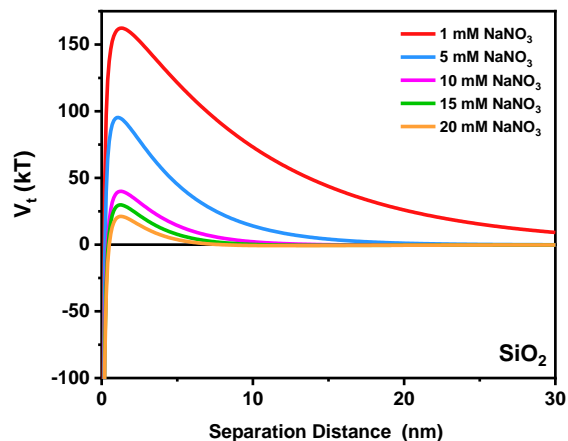

**Figure S10.** DLVO interaction energy profiles for  $\text{MnO}_2$  colloids approaching silica surface as function of 1 mM, 5 mM, 10 mM, 15 mM, and 20 mM  $\text{NaNO}_3$  at pH 6.0.

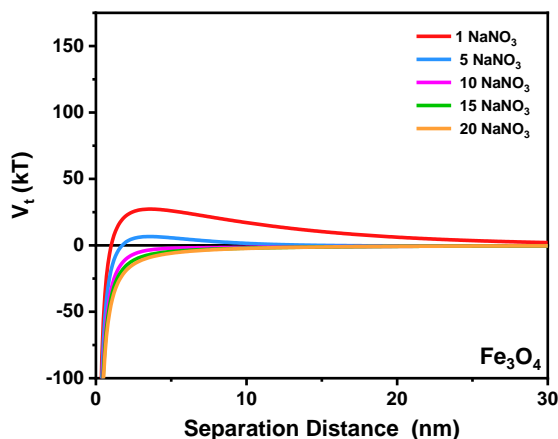

**Figure S11.** DLVO interaction energy profiles for  $\text{MnO}_2$  colloids approaching magnetite surface as function of 1 mM, 5 mM, 10 mM, 15 mM, and 20 mM  $\text{NaNO}_3$  at pH 6.0.

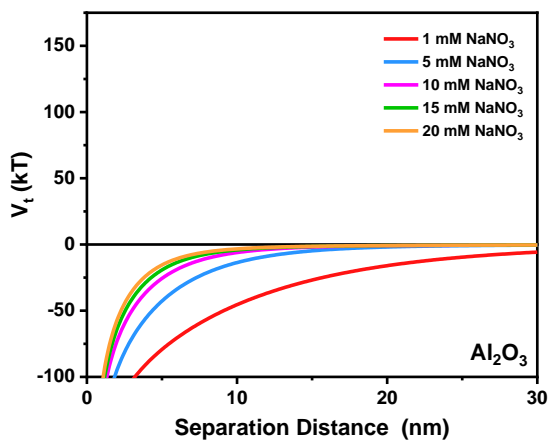

**Figure S12.** DLVO interaction energy profiles for  $\text{MnO}_2$  colloids approaching alumina surface as function of 1 mM, 5 mM, 10 mM, 15 mM, and 20 mM  $\text{NaNO}_3$  at pH 6.0.

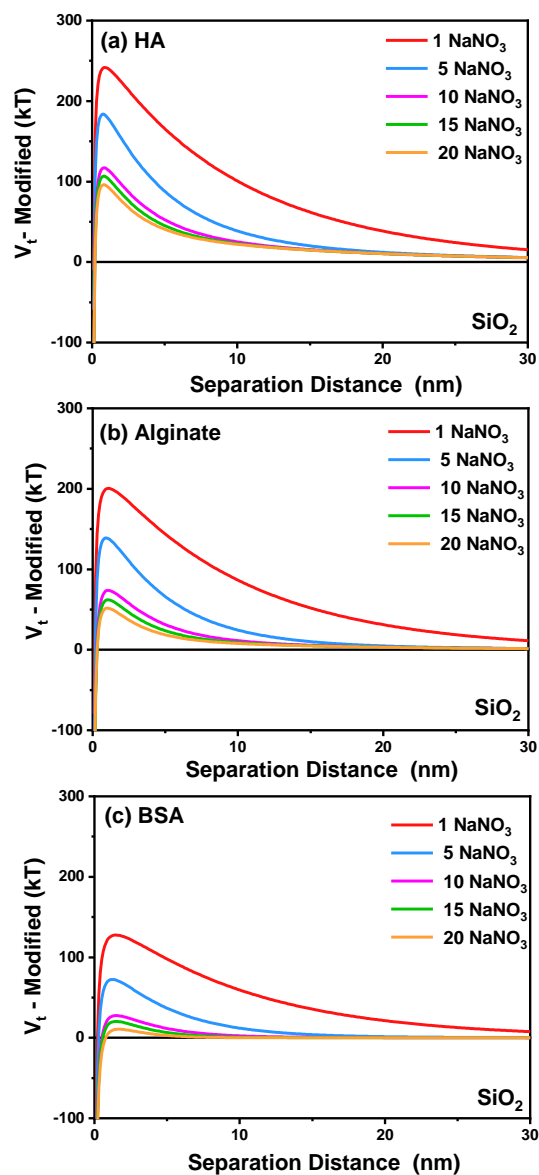

**Figure S13.** Extended DLVO interaction energy profiles for  $\text{MnO}_2$  colloids approaching silica surface in the presence of (a) HA, (b) alginate and (c) BSA as function of 1 mM, 5 mM, 10 mM, 15 mM, and 20 mM  $\text{NaNO}_3$  at pH 6.0.

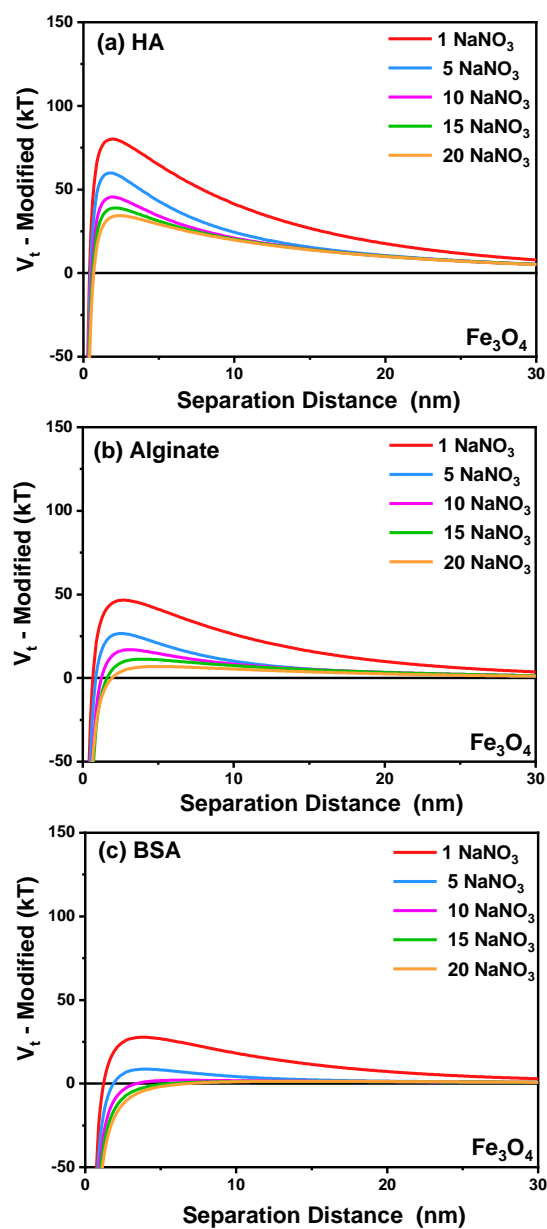

**Figure S14.** Extended DLVO interaction energy profiles for  $\text{MnO}_2$  colloids approaching magnetite surface in the presence of (a) HA, (b) alginate and (c) BSA as function of 1 mM, 5 mM, 10 mM, 15 mM, and 20 mM  $\text{NaNO}_3$  at pH 6.0.

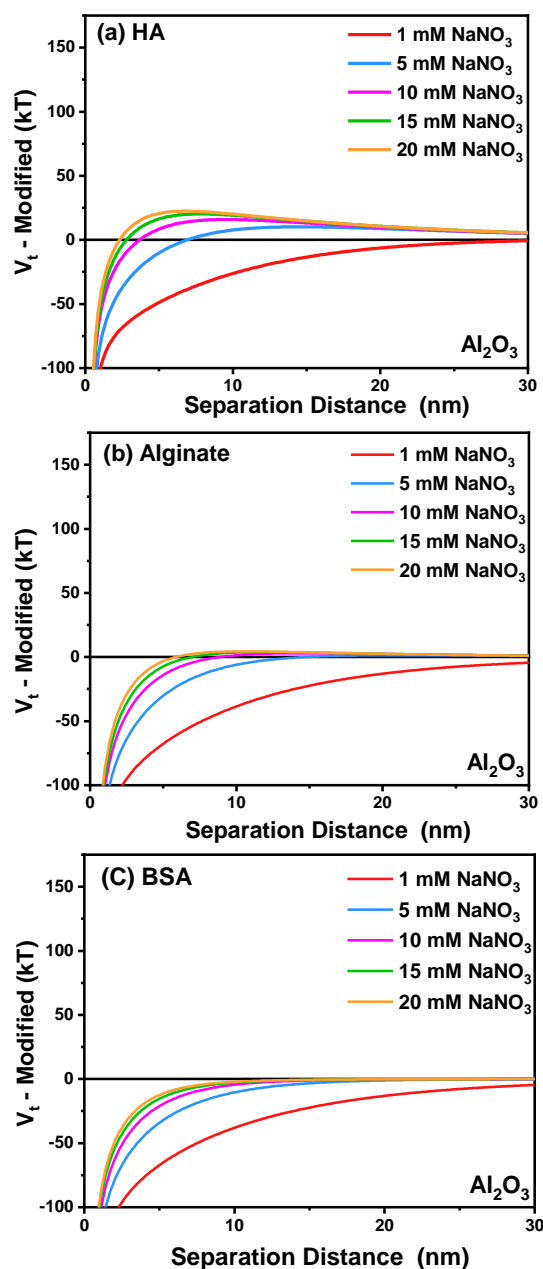

**Figure S15.** Extended DLVO interaction energy profiles for  $\text{MnO}_2$  colloids approaching alumina surface in the presence of (a) HA, (b) alginate and (c) BSA as function of 1 mM, 5 mM, 10 mM, 15 mM, and 20 mM  $\text{NaNO}_3$  at pH 6.0.

**Table S4.** Deposition rate of BSA, MnO<sub>2</sub> colloids, and MnO<sub>2</sub> colloids+BSA onto silica, magnetite and alumina surface, i.e.,  $|r_{f,BSA}|$ ,  $|r_{f,MnO_2 \text{ colloids}}|$  and  $|r_{f,MnO_2 \text{ colloids}+BSA}|$ , respectively.

| Surface Type                   | Na concentration (mM) | Deposition Rate (Hz/min) |                 |                     |                             |
|--------------------------------|-----------------------|--------------------------|-----------------|---------------------|-----------------------------|
|                                |                       | $ r_{f,BSA} $            | $ r_{f,MnO_2} $ | $ r_{f,MnO_2+BSA} $ | $ r_{f,BSA} + r_{f,MnO_2} $ |
| SiO <sub>2</sub>               | 5                     | 4.302                    | 0.528           | 2.442               | 4.830                       |
|                                | 10                    | 4.122                    | 4.704           | 48.177              | 8.826                       |
|                                | 15                    | 3.324                    | 42.756          | 116.094             | 46.08                       |
|                                | 20                    | 1.02                     | 0.834           | 39.213              | 1.854                       |
|                                | 50                    | 0.564                    | -               | 3.126               | -                           |
| Fe <sub>3</sub> O <sub>4</sub> | 5                     | 2.268                    | 14.388          | 28.986              | 16.656                      |
|                                | 10                    | 1.488                    | 185.112         | 172.122             | 186.6                       |
|                                | 15                    | 1.32                     | 101.736         | 208.65              | 103.056                     |
|                                | 20                    | 1.134                    | 3.444           | 181.23              | 4.578                       |
|                                | 50                    | 0.99                     | -               | 4.65                | -                           |
| Al <sub>2</sub> O <sub>3</sub> | 5                     | 4.302                    | 200.706         | 172.122             | 205.008                     |
|                                | 10                    | 3.517                    | 109.982         | 208.65              | 113.994                     |
|                                | 15                    | 1.338                    | 31.236          | 194.55              | 32.574                      |
|                                | 20                    | 1.068                    | 1.594           | 117.924             | 2.662                       |
|                                | 50                    | 0.684                    | -               | 2.358               | -                           |

$|r_{f,BSA}|$  refers to the deposition rate of BSA macromolecule onto three surfaces.

$|r_{f,MnO_2 \text{ colloids}}|$  refers to the deposition rate of MnO<sub>2</sub> colloids onto three surfaces without background macromolecules.

$|r_{f,MnO_2+BSA}|$  refers to the deposition rate of MnO<sub>2</sub> colloids in the presence of BSA.

$|r_{f,BSA}|+|r_{f,MnO_2}|$  refers to the the sum of  $|r_{f,BSA}|$  and  $|r_{f,MnO_2 \text{ colloids}}|$ .

**Table S5.** EPM of MnO<sub>2</sub> colloids in the presence of HA, Alginate and BSA as a function of NaNO<sub>3</sub>.

| Na concentration (mM) | EPM( 10 <sup>-8</sup> m <sup>-2</sup> V <sup>-1</sup> s <sup>-1</sup> ) |                      |                            |                       |
|-----------------------|-------------------------------------------------------------------------|----------------------|----------------------------|-----------------------|
|                       | MnO <sub>2</sub> only                                                   | MnO <sub>2</sub> +HA | MnO <sub>2</sub> +Alginate | MnO <sub>2</sub> +BSA |
| 5                     | -3.26±0.36                                                              | -3.48±0.37           | -3.07±0.31                 | -2.14±0.19            |
| 10                    | -2.68±0.33                                                              | -2.83±0.35           | -2.59±0.28                 | -2.08±0.23            |
| 15                    | -2.46±0.31                                                              | -2.71±0.29           | -2.50±0.27                 | -2.01±0.39            |
| 20                    | -2.31±0.25                                                              | -2.68±0.31           | -2.42±0.24                 | -1.96±0.19            |
| 30                    | -2.19±0.22                                                              | -2.57±0.28           | -2.29±0.23                 | -1.85±0.17            |
| 50                    | -2.14±0.31                                                              | -2.53±0.27           | -2.15±0.19                 | -1.71±0.16            |



## REFERENCES

1. Huangfu, X.; Jiang, J.; Ma, J.; Liu, Y.; Yang, J., Aggregation Kinetics of Manganese Dioxide Colloids in Aqueous Solution: Influence of Humic Substances and Biomacromolecules. *Environ Sci Technol* **2013**, *47*, (18), 10285-10292.
2. Healy, T. W., *Colloidal silica: Fundamentals and Application*. CRC Press: Boca Raton, 2006.
3. Bahena, J. L. R.; Cabrera, A. R.; Valdivieso, A. L.; Urbina, R. H., Fluoride adsorption onto  $\alpha$ -Al<sub>2</sub>O<sub>3</sub> and its effect on the zeta potential at the alumina–aqueous electrolyte interface. *Sep Sci Technol* **2002**, *37*, (8), 1973–1987.
4. Erdemoğlu, M.; Sarıkaya, M., Effects of heavy metals and oxalate on the zeta potential of magnetite. *J Colloid Interf Sci* **2006**, *300*, 795–804.
5. Petosa, A. R.; Jaisi, D. P.; Quevedo, I. R.; Elimelech, M.; Tufenkji, N., Aggregation and deposition of engineered nanomaterials in aquatic environments: Role of physicochemical interactions. *Environ. Sci. Technol.* **2010**, *44*, (17), 6532-6549.
6. Vincent, B.; Edwards, J.; Emmett, S.; Jones, A., Depletion flocculation in dispersions of sterically-stabilised particles (“soft spheres”). *Colloids and Surfaces* **1986**, *18*, (2), 261-281.
7. Phenrat, T.; Song, J. E.; Cisneros, C. M.; Schoenfelder, D. P.; Tilton, R. D.; Lowry, G. V., Estimating attachment of nano- and submicrometer-particles coated with organic macromolecules in porous media: Development of an empirical model. *Environ Sci Technol* **2010**, *44*, (12), 4531-4538.
8. Wang, D. J.; Bradford, S. A.; Harvey, R. W.; Gao, B.; Cang, L.; Zhou, D. M., Humic Acid Facilitates the Transport of ARS-Labeled Hydroxyapatite Nanoparticles in Iron Oxyhydroxide-Coated Sand. *Environ Sci Technol* **2012**, *46*, (5), 2738-2745.
9. Lv, X.; Gao, B.; Sun, Y.; Shi, X.; Xu, H.; Wu, J., Effects of Humic Acid and Solution Chemistry on the Retention and Transport of Cerium Dioxide Nanoparticles in Saturated Porous Media. *Water, Air, & Soil Pollution* **2014**, *225*, (10), 2167.
10. Sun, B.; Zhang, Y.; Chen, W.; Wang, K.; Zhu, L., Concentration Dependent Effects of Bovine Serum Albumin on Graphene Oxide Colloidal Stability in Aquatic

Environment. *Environ Sci Technol* **2018**, 52, (13), 7212-7219.

11. Huangfu, X.; Jiang, J.; Ma, J.; Liu, Y.; Yang, J., Aggregation kinetics of manganese dioxide colloids in aqueous solution: influence of humic substances and biomacromolecules. *Environ. Sci. Technol.* **2013**, 47, (18), 10285-92.

12. Hong, S. K.; Elimelech, M., Chemical and physical aspects of natural organic matter (NOM) fouling of nanofiltration membranes. *J Membrane Sci* **1997**, 132, (2), 159-181.

13. Elimelech, M.; Gregory, J.; Jia, X.; Williams, R. A., Particle Deposition and Aggregation: Measurement, Modeling, and Simulation. *Butterworth-Heinemann: Oxford, England* **1995**.

14. Israelachvili, J. N., *Intermolecular and Surface Forces*. Academic Press: London, 2011.

15. Bergström, L., Hamaker constants of inorganic materials. *Advances in Colloid and Interface Science* **1997**, 70, 125-169.

16. Faure, B.; Salazar-Alvarez, G.; Bergström, L., Hamaker Constants of Iron Oxide Nanoparticles. *Langmuir* **2011**, 27, (14), 8659–8664.
